# Supplementary material for: Quantitative analysis of miniature synaptic calcium transients using positive unlabeled deep learning
Source: Royal Society of Chemistry journal article supplement (doi:10.1039/d4dd00197d), 2024-11-20
Supplement: d4dd00197d1.pdf [file d4dd00197d1.pdf]

## Supplementary Material

### 1079 Tables

| Model        | TP % | FP % | FN % |
|--------------|------|------|------|
| IDT          | 33.0 | 14.3 | 52.7 |
| StarDist 1-0 | 35.6 | 7.9  | 56.5 |
| U-Net 1-0    | 36.4 | 50.4 | 13.2 |
| U-Net 1-64   | 49.8 | 15.7 | 34.5 |

Supplementary Tab. 1 Proportion of true positives, false positives and false negatives per model.

| Feature                   | Description                                                                 |
|---------------------------|-----------------------------------------------------------------------------|
| Volume                    | Volume of an event                                                          |
| Intensity <sub>max</sub>  | Maximum $\Delta F/F_0$ of the entire event                                  |
| Intensity <sub>mean</sub> | Mean $\Delta F/F_0$ of the entire event                                     |
| Duration                  | Length in time of the event                                                 |
| Aspect                    | Aspect ratio of the event calculated as $\frac{\text{minor}}{\text{major}}$ |
| Solidity                  | Solidity of an event                                                        |
| Intensity <sub>int</sub>  | The integration of the averaged intensity profile in time of an event       |
| Frequency                 | Number of events at the event $(x,y)$ location                              |

Supplementary Tab. 2 Shape and intensity features of events. Most features are extracted by using regionprops from Scikit-Image<sup>76</sup>.

| Feature                   | minimum | maximum |
|---------------------------|---------|---------|
| Volume (Voxels)           | 112     | 6777    |
| Intensity <sub>max</sub>  | 1.04    | 5.55    |
| Intensity <sub>mean</sub> | 0.45    | 1.03    |
| Duration                  | 4       | 10      |
| Aspect                    | 0.16    | 0.49    |
| Solidity                  | 0.73    | 0.89    |
| Intensity <sub>int</sub>  | 0.96    | 3.37    |
| Frequency                 | 0       | 13      |

Supplementary Tab. 3 Values used to normalize the features in Figure 5p,h

|          | 3D U-Net           | StarDist-3D |
|----------|--------------------|-------------|
| PU ratio | Average Precision  |             |
| 1-0      | 0.39 ± 0.06        | 0.50 ± 0.03 |
| 1-1      | 0.44 ± 0.08        | 0.48 ± 0.03 |
| 1-2      | 0.46 ± 0.07        | 0.52 ± 0.04 |
| 1-4      | 0.49 ± 0.08        | 0.34 ± 0.04 |
| 1-8      | 0.51 ± 0.09        | 0.53 ± 0.04 |
| 1-16     | 0.56 ± 0.12        | 0.49 ± 0.04 |
| 1-32     | 0.58 ± 0.10        | 0.52 ± 0.04 |
| 1-64     | <b>0.59 ± 0.08</b> | 0.40 ± 0.04 |
| 1-128    | 0.51 ± 0.11        | 0.45 ± 0.03 |
| 1-256    | 0.54 ± 0.07        | 0.46 ± 0.03 |

Supplementary Tab. 4 Average precision of the different models averaged over 25 effective seeds with standard deviation shown. In bold is the top performing model (3D U-Net with PU ratio of 1-64).

| Hyper-parameter  | Value    |
|------------------|----------|
| min_sample_split | 2        |
| max_depth        | 5        |
| class_weight     | balanced |

Supplementary Tab. 5 Hyper-parameters of the Decision Tree Classifier that were used to classify the type of events ( $R_b$  vs. S,  $R_a$  vs. N, and N vs. S).

### Figures

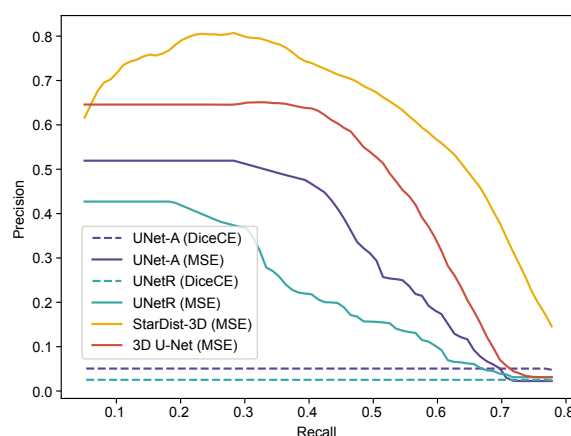

Supplementary Fig. 1 Detection performance of all deep neural networks trained on the 1-0 PU configuration.

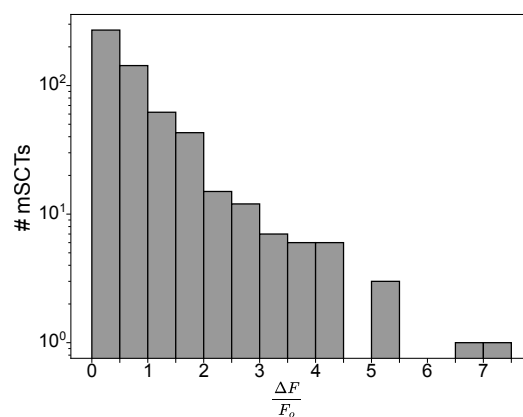

Supplementary Fig. 2 Histogram of the number of ground truth MSCTs as a function of their  $\Delta F/F_0$ .

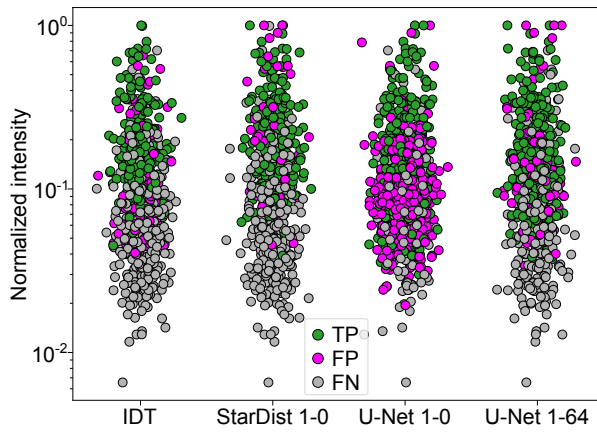

Supplementary Fig. 3 Events detected by the models plotted as a function of their intensity and their detection type (True Positive, False Positive or False Negative).

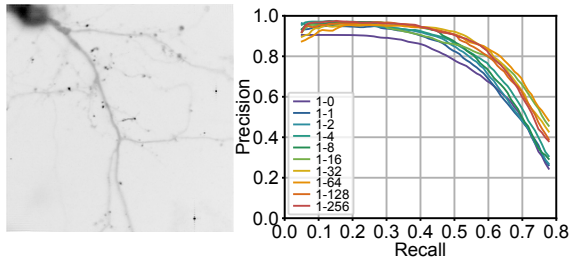

Supplementary Fig. 4 Detection performance of 3D U-Net on out-of-distribution data. (left) Maximal projection of  $\text{Ca}^{2+}$  movie. (right) Precision-recall curves for the different PU ratios.

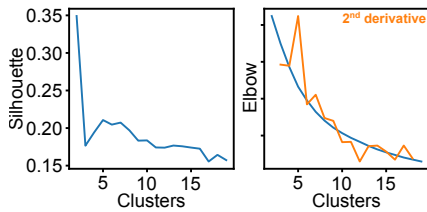

Supplementary Fig. 5 Silhouette and Elbow score as a function of the number of clusters from  $k$ -means for the segmentation of mSCTs in the cLTP condition. For the Elbow method, the 2<sup>nd</sup> is presented to show the highest deflection point. Both methods agree for 5 clusters.
